# Supplementary material for: Suppression Colitis and Colitis-Associated Colon Cancer by Anti-S100a9 Antibody in Mice
Source: PubMed Central journal article supplement (PMC5733461; doi:10.3389/fimmu.2017.01774), 2017-12-13
Supplement: Image_1.pdf [file Image_1.pdf]

## Supplementary Figures

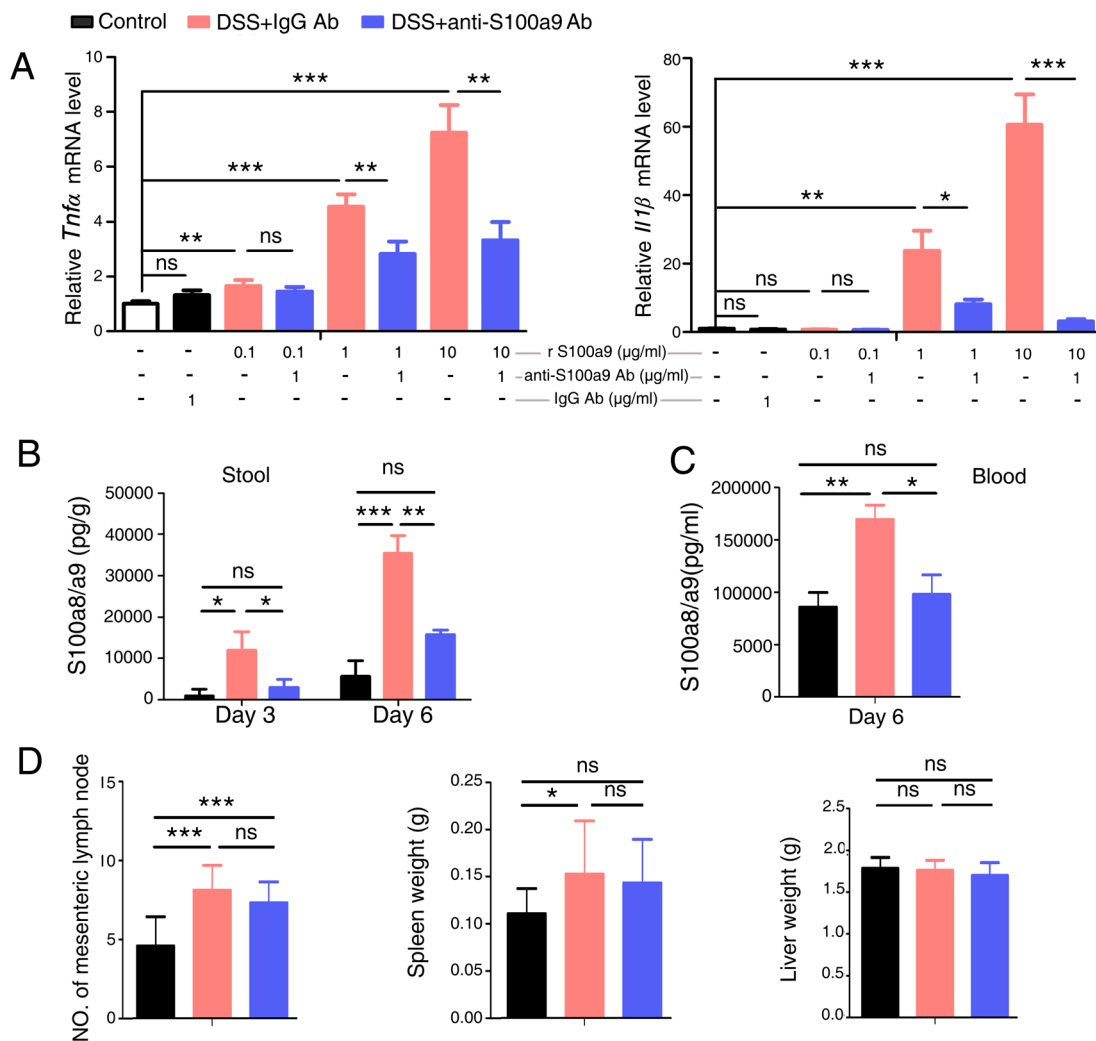

**Supplementary Figure S1. Effect of neutralizing S100a9 antibody in DSS-induced acute colitis.** (A) The mRNA expression levels of *Tnfa* and *Il1b* in untreated, recombinant S100a9 protein-treated, anti-S100a9 Ab-treated, and IgG Ab-treated macrophages were measured by qRT-PCR at 24 h. The concentration of S100a8/a9 in the feces (B) and blood (C) of the mice was tested by ELISA at day 3 and day 6. (D) The number of mesenteric lymph node and the weight of spleen and liver were calculated at day 6. n = 5 per group. One-way analysis of variance followed by Bonferroni correction. Results are representative of the three experiments performed. Error bars represent S.D.

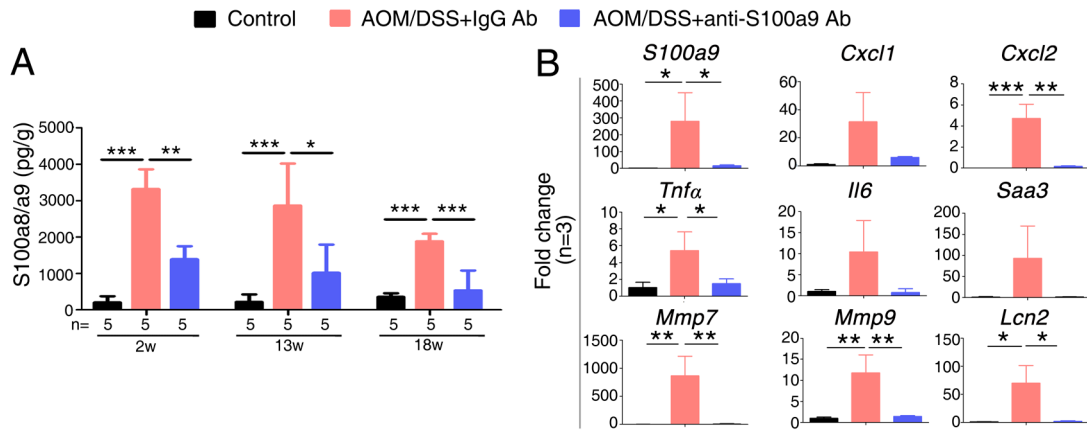

**Supplementary Figure S2. The neutralization activity of anti-S100a9 antibody in the CAC mouse model.** (A) The concentration of S100a8/a9 in the feces of normal control, IgG Ab treated, and anti-S100a9 Ab treated CAC mice was tested by ELISA at the end of the 2nd, 13th, and 18th week. n=5 per group. (B) Relative mRNA expression levels of *S100a9* and its downstream target molecules (*Cxcl1*, *Cxcl2*, *Tnfa*, *Il6*, *Saa3*, *Mmp7*, *Mmp9* and *Lcn2*) in normal control, IgG Ab treated, and anti-S100a9 Ab treated CAC mice were obtained from RNA-seq results. n=3 per group. One-way analysis of variance followed by Bonferroni correction. Results are representative of the three experiments performed. Error bars represent S.D.

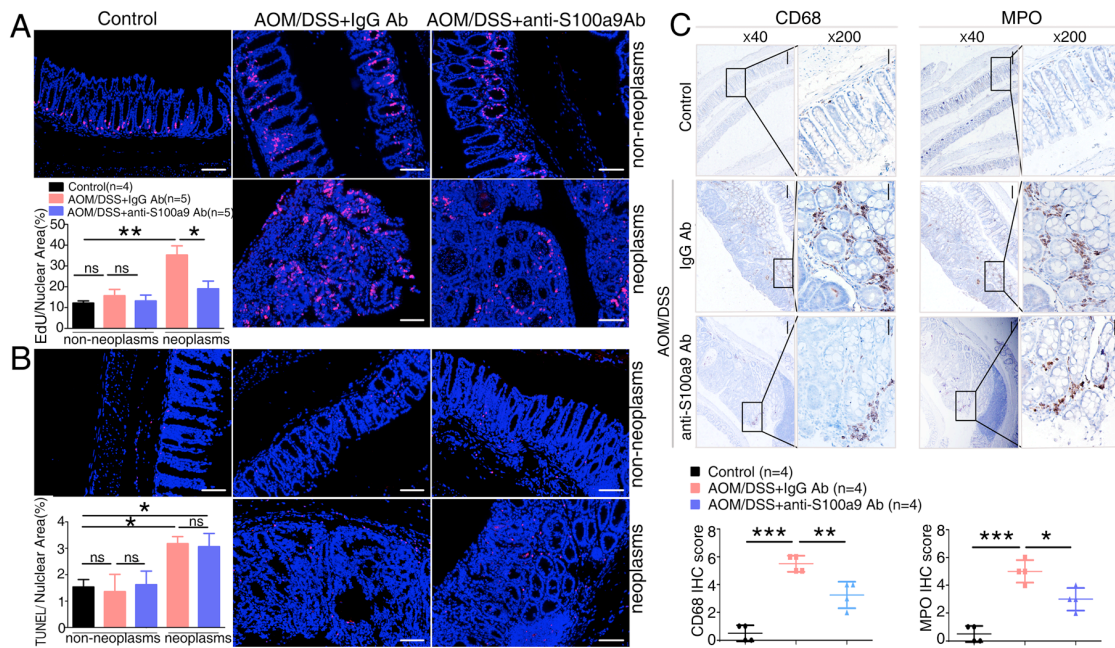

**Supplementary Figure S3. Effects of anti-S100a9 Ab treatment on cell death, proliferation, and inflammatory cells infiltration in the AOM/DSS-induced CAC mouse model.** Representative EdU staining (A) and TUNEL staining (B) of colon tissues in normal control mice and AOM/DSS-induced CAC mice which were treated with IgG Ab or anti-S100a9 Ab at the end of 18th week (n=5 per group). The percent of positive cells in neoplasms and non-neoplasms were measured. At least 6 fields were counted per mouse. Scale bar, 100  $\mu$ m. One-way analysis of variance followed by Bonferroni correction. Data represent means $\pm$ SEM of one representative experiment from three repeats. (C) Immunohistochemical staining of MPO and CD68 in the normal control and IgG Ab, or anti-S100a9 Ab treated CAC mice at the end of 18th week (left panels: original magnification 40 $\times$ , scale bar: 200  $\mu$ m; right panels: original magnification 200 $\times$ , scale bar: 50  $\mu$ m). Staining scores were counted. n=4 per group. One-way analysis of variance followed by Bonferroni correction. Results are representative of the three experiments performed. Error bars represent S.D.

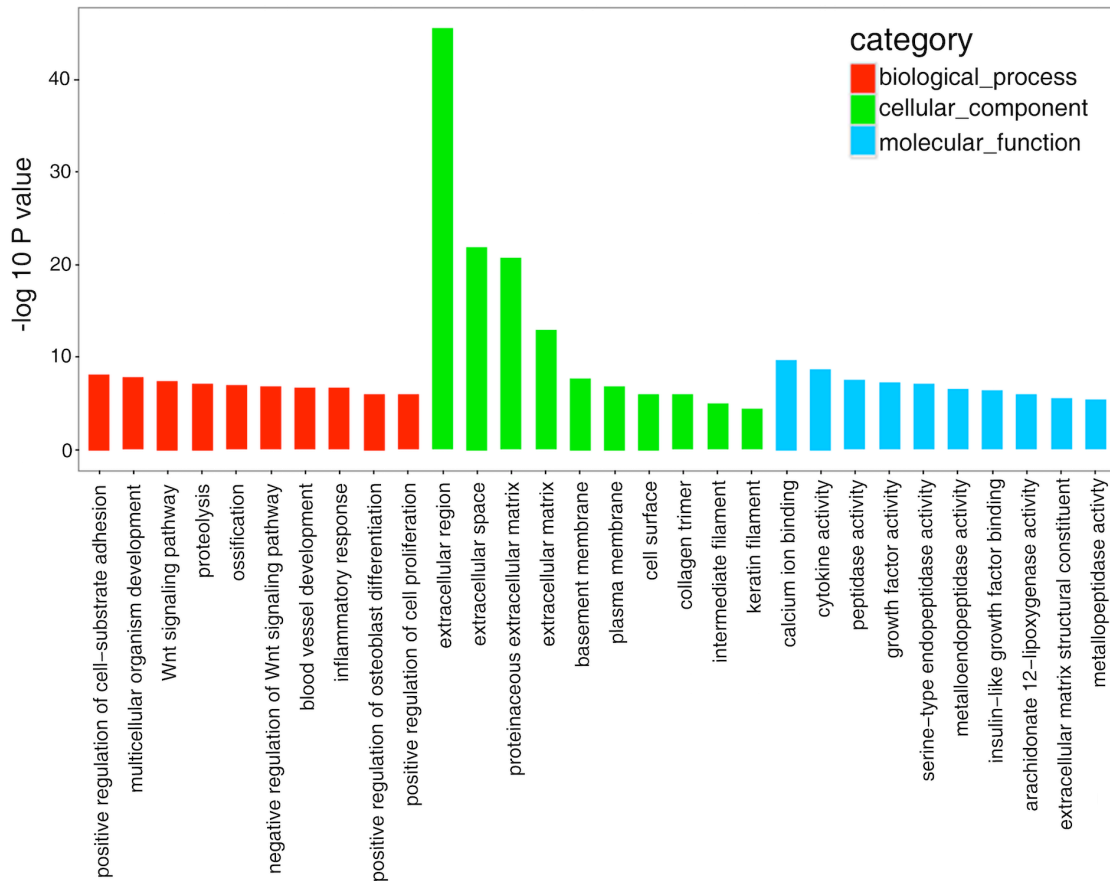

**Supplementary Figure S4.** Gene ontology analysis for 585 differentially expressed genes ( $\geq 2$ -fold change), which were stimulated by AOM/DSS but were repressed by anti-S100a9 Ab treatment in the AOM/DSS-induced CAC mouse model. The top 10 Gene Ontology (GO) categories of biological process, cellular component, and molecular function are shown here.
